# Supplementary material for: Multiple System Atrophy and Progressive Supranuclear Palsy in Persian Population: A Retrospective Cross-sectional Study
Source: Research Square preprint supplement (doi:10.21203/rs.3.rs-6526460/v1), 2025-05-09

Age distribution of patients with Parkinsonism as SOO (Age < 70)

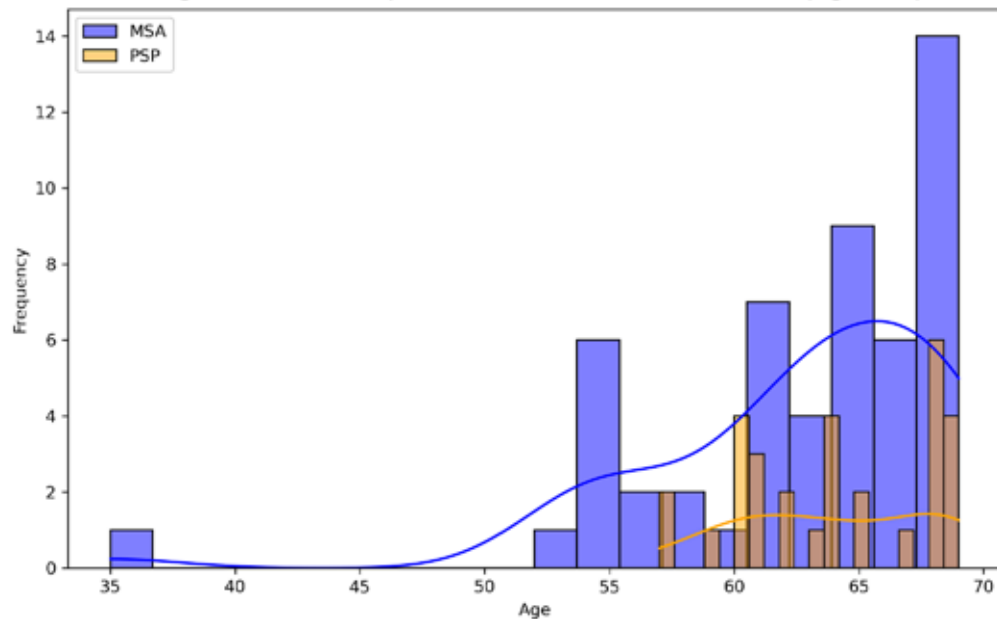

Age distribution of patients with Parkinsonism as SOO (Age > 70)

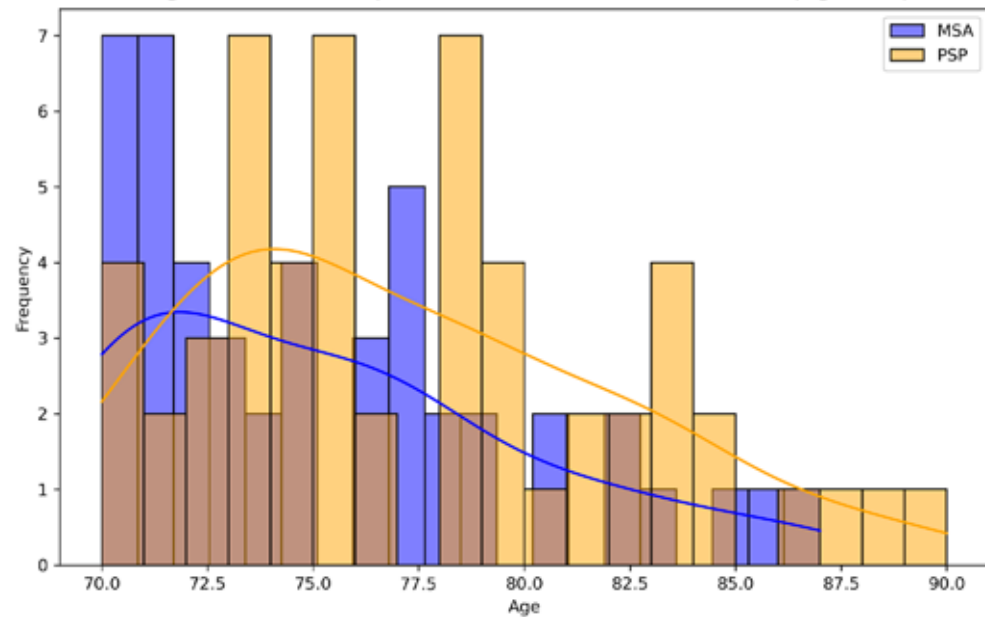

Supplement: Supplementary file 2 [file 969cd792d784bf5e76a95074.pdf]
