# Supplementary figures and images for: Multiple System Atrophy and Progressive Supranuclear Palsy in Persian Population: A Retrospective Cross-sectional Study
Source: Research Square preprint supplement (doi:10.21203/rs.3.rs-6526460/v1), 2025-05-09

Mosaic Plot of MSA Classification and Clinical Diagnosis

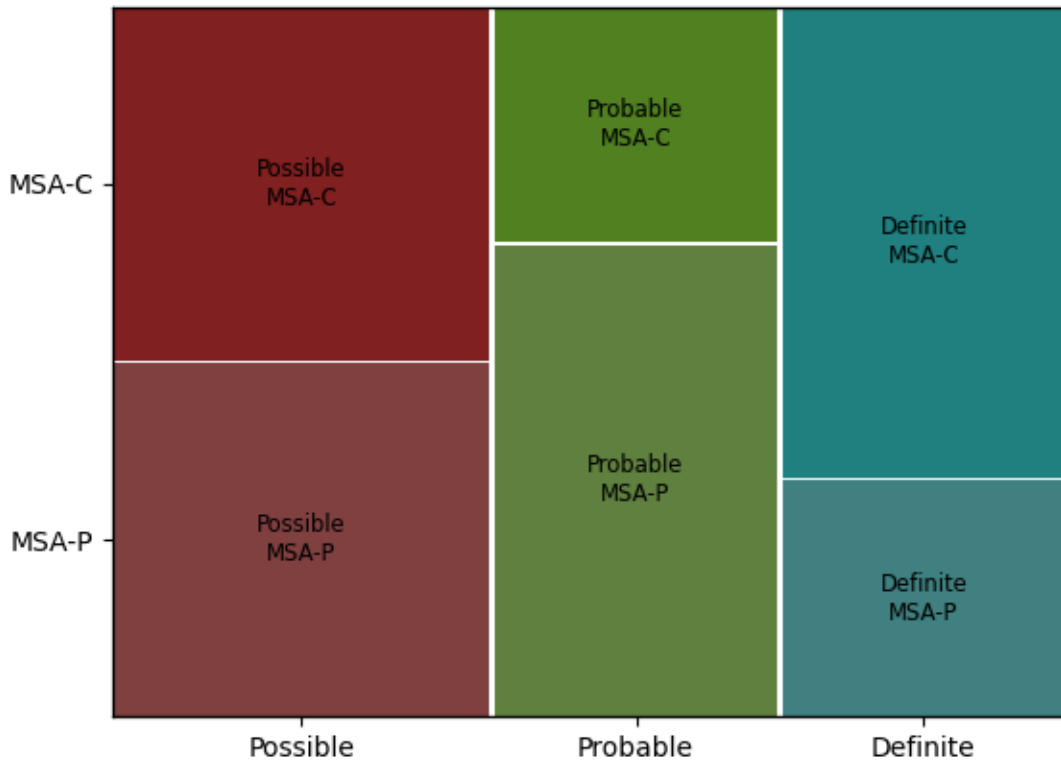

Supplement: Supplementary file 1 [file 6420dab01f0b40314a0d4150.pdf]
